# Supplementary material for: Galactosylceramide Upregulates the Expression of the BCL2 Gene and Downregulates the Expression of TNFRSF1B and TNFRSF9 Genes, Acting as an Ani-apoptotic Molecule in Breast Cancer Cells
Source: Preprints.org preprint supplement (doi:10.20944/preprints202312.0122.v1), 2023-12-05
Supplement: Supplementary file 1 [file supplementary]

| **Table S1. List of primers used in this study, related to the experimental procedures** | | | | | | |
| --- | --- | --- | --- | --- | --- | --- |
| **primer** | **species** | **application** | **annealing temp. (oC)** | **primer sequence 5’-3’** | **primer length** | **reference** |
| RT-forUGT8a | mouse | Real-time-PCR assay | 55 | CATGGTGTCCCTGTAGTGG | 19 | This work |
| RT-revUGT8a | GAGCCCTCTGCCGATAAC | 18 |
| RT-forAKT-m | mouse | 55 | ACCACACCTTCTACAATGAGC | 21 | This work |
| RT-revAKT-m | GACAGCACAGCCTGGATGGC | 20 |
| RT-forUGT8 | human | 55 | CATGGTGTGCCTGTAGTGG | 19 | Owczarek et al., 2013 |
| RT-revUGT8 | GAGCCCTCTGACGGTAGC | 18 |
| RT-forAKT | human | 55 | ACCACACCTTCTACAATGAGC | 21 | Suchanski et al., 2017 |
| RT-revAKT | GATAGCACAGCCTGGATAGC | 20 |
| RT-forTNFRSF1B | human | 58 | CACATGCCGGCTCAGAGAAT | 20 | This work |
| RT-revTNFRSF1B | AGCTGGGTGTATGTGCTGTC | 20 |
| RT-forTNFRSF9 | human | 58 | CTCACGCTCCGTTTCTCTGT | 20 | This work |
| RT-revTNFRSF9 | GAAATCGGCAGCTACAGCCA | 20 |
| RT-forBCL2 | human | 58 | CTTTGAGTTCGGTGGGGTCA | 20 | This work |
| RT-revBCL2 | GGGCCGTACAGTTCCACAAA | 20 |
| forMluI-P-Bcl2 | human | Promotor insertion into pGL3-Basic luciferase vector | 55 | CA**ACGCGT**GAGGGCTCTTTCTTTCTTCT  **MluI** | 28 | This work |
| revHindIII-P-Bcl2 | GA**AAGCTT**AGCTGATTTGAAACTTCCCA  **HindIII** | 28 |
| forMluI-P- TNFRSF9 | human | 55 | CA**ACGCGT**CCTCCTTCCTCCCTCTGTC  **Mlu I** | 27 | This work |
| revHindIII-P-TNFRSF9 | GA**AAGCTT**CCCCAGATGGACAGACCTT  **HindIII** | 27 |
| forMluI-P-TNFRSF1B | human | 55 | CA**ACGCGT**ATGGTGGCCCGAGCCTGT  **Mlu I** | 26 | This work |
| revHindIII-P-TNFRSF1B | GA**AAGCTT**TGGGCCGCGCGAGTCA  **HindIII** | 24 |
| forEcoRI-UGT8a | mouse | UGT8a-expressing vector construction | 52 | C**GAATTC**ATGAAGTCTTACACTCC  **EcoRI** | 24 | This work |
| revMluI-UGT8a | GA**ACGCGT**TCATCTCACCTTCTTTT  **MluI** | 25 |
| forXhoI-UGT8 | human | UGT8-expressing vector construction | 52 | C**CTCGAG**CGCCTCCATGAAGTCTTACACTCCATATT  **XhoI**  GC**GGATCC**TCATTTCACTTTCTTTTCATGT  **BamhI** | 29  22 | Suchanski et al., 2017 |
| revBamHI-UGT8 |
| F1-exon2/UGT8 | human | Genome sequencing after CRISPR-Cas9 editing | 55 | GCCGCCAATTATGTTTGAAAGC | 22 | This work |
| R1-exon2/UGT8 | GGCTGGACCCATGAACCAAA | 20 |
